# Supplementary material for: Fasting and Glucose Metabolism Differentially Impact Peripheral Inflammation in Human Type 2 Diabetes
Source: MDPI journal article supplement (doi:10.3390/nu16101404), 2024-05-07
Supplement: s1 [file s1]

# SUPPLEMENTARY MATERIALS

Table S1. Description of human donors

|                                          | Lean BMI + NGT              | Overweight/obesity<br>NGT | + Overweight/obesity<br>T2D           |
|------------------------------------------|-----------------------------|---------------------------|---------------------------------------|
| Age, years [median(range)]               | 57 (36 – 67)                | 49 (36 – 63)              | 52 (37 – 64)                          |
| BMI, kg m <sup>2</sup> [median(range)]   | 22.9 (18 – 24) <sup>†</sup> | 31.3 (27 – 43)            | 35.3 (26 – 40)                        |
| FBG, mg dl <sup>-1</sup> [median(range)] | 98 (93 – 98)<br>n = 3       | 93.5 (88 – 98)<br>n = 13  | *N/A<br>*n = 0                        |
| A1c, % [median(range)]                   | 5.4 (5.2 – 5.4)<br>n = 3    | 5.4 (4.7 – 5.5)<br>n = 13 | 7 (5.5 – 10.8) <sup>‡</sup><br>n = 25 |
| Total N                                  | 17                          | 13                        | 26                                    |
| Females                                  | 13                          | 9                         | 13                                    |
| Males                                    | 4                           | 4                         | 13                                    |
| White                                    | 16                          | 12                        | 18                                    |
| Black/AA                                 | 0                           | 1                         | 8                                     |
| Native American                          | 1                           | 0                         | 0                                     |

\*FBG is not measured for subjects with T2D. Clinical diagnosis of T2D was sufficient for subjects on glycemic control drugs; NGT was confirmed in some subjects based on 2hr oral glucose tolerance test blood glucose measures (not shown).

†Indicates a significant difference between LeanNGT and ObNGT or T2D subjects and ‡significant difference between T2D and LeanNGT or ObNGT subjects based on Student's t-test ( $P < 0.05$ )

Table S2. List of medications and smoker status

| Medications            | LeanNGT | ObNGT | T2D   |
|------------------------|---------|-------|-------|
| Metformin (N)          | 0/17    | 0/13  | 19/26 |
| Thiazolidinediones (N) | 0/17    | 0/13  | 1/26  |
| DPP-4 Inhibitors (N)   | 0/17    | 0/13  | 2/26  |
| Sulfonylureas (N)      | 0/17    | 0/13  | 5/26  |
| Statins (N)            | 1/17    | 1/13  | 17/26 |
| ACE Inhibitors (N)     | 0/17    | 1/13  | 7/26  |
| Smoker (N)             | 0/17    | 0/13  | 0/26  |

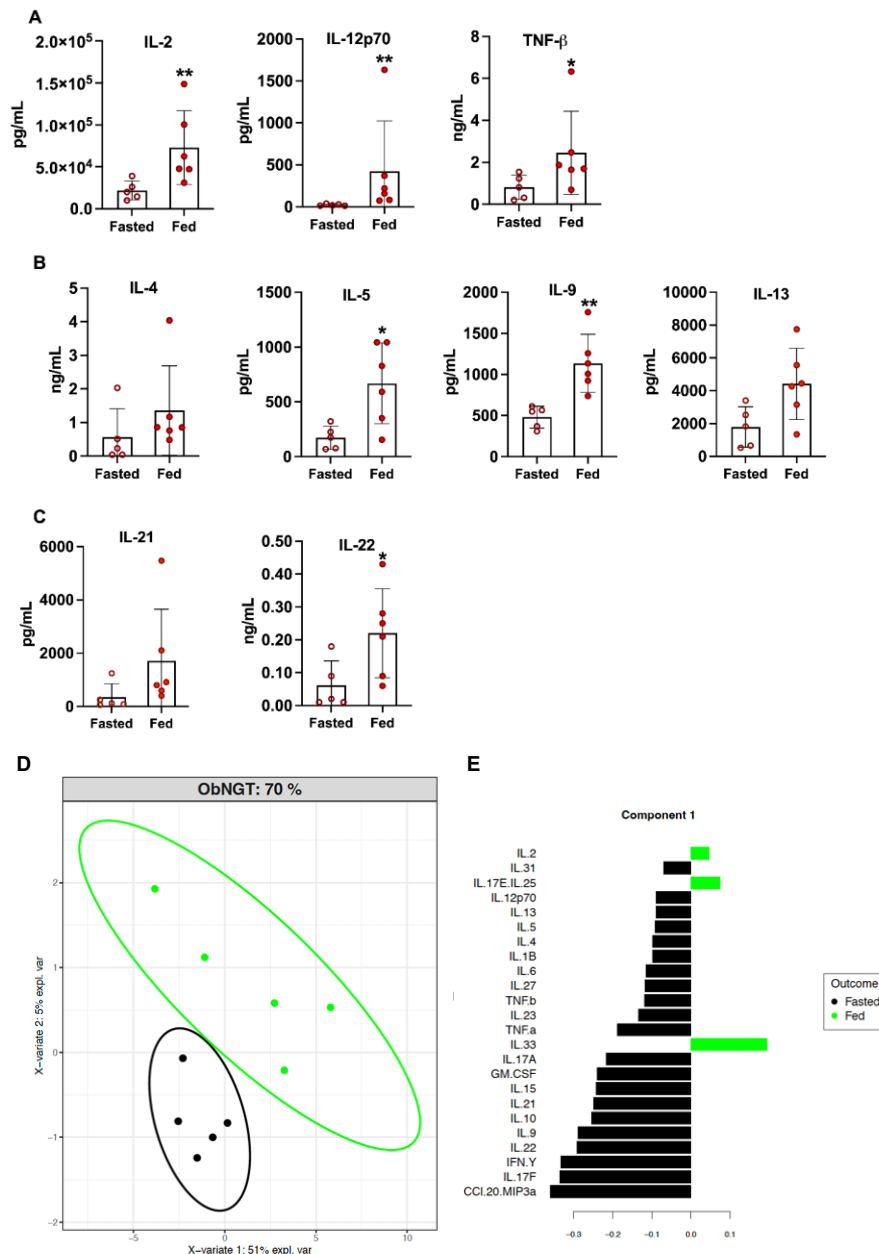

**Figure S1. Cytokine production is higher by PBMCs from fed compared to fasting T2D and ObNGT subjects.** (A-C) Cytokines from Fig 1B in CD3/CD28-stimulated cells from fasted (n = 5, open circles) and fed (n = 6, closed circles) subjects with T2D. Cytokines for stimulated cells are categorized by Th1 (A), Th2 (B), and Th17 (C) according to the literature. Differences were assessed by a Mann-Whitney U test. \*: p < 0.05, \*\*: p < 0.01. (D) Cytokine production by T cell-stimulated (CD3/CD28) PBMCs from normoglycemic subjects with obesity (ObNGT) who were fasted (black dots) or fed (green dots) as analyzed by partial least squares analysis (PLSDA). The same N=5 subjects provided samples on two different days: (1) after a >12 hr fast or (2) after a morning meal. All samples were collected at 8-10a. (E) Top-ranked cytokines from PLSDA with a VIP Score >1 that distinguished Fed and fasted subjects' cells. The four cytokines that characterize a fed state in T2D subjects (Figure 1; IL-9, IL-12p70, IL-2, and IL-5) did not dominate a fed state in ObNGT.

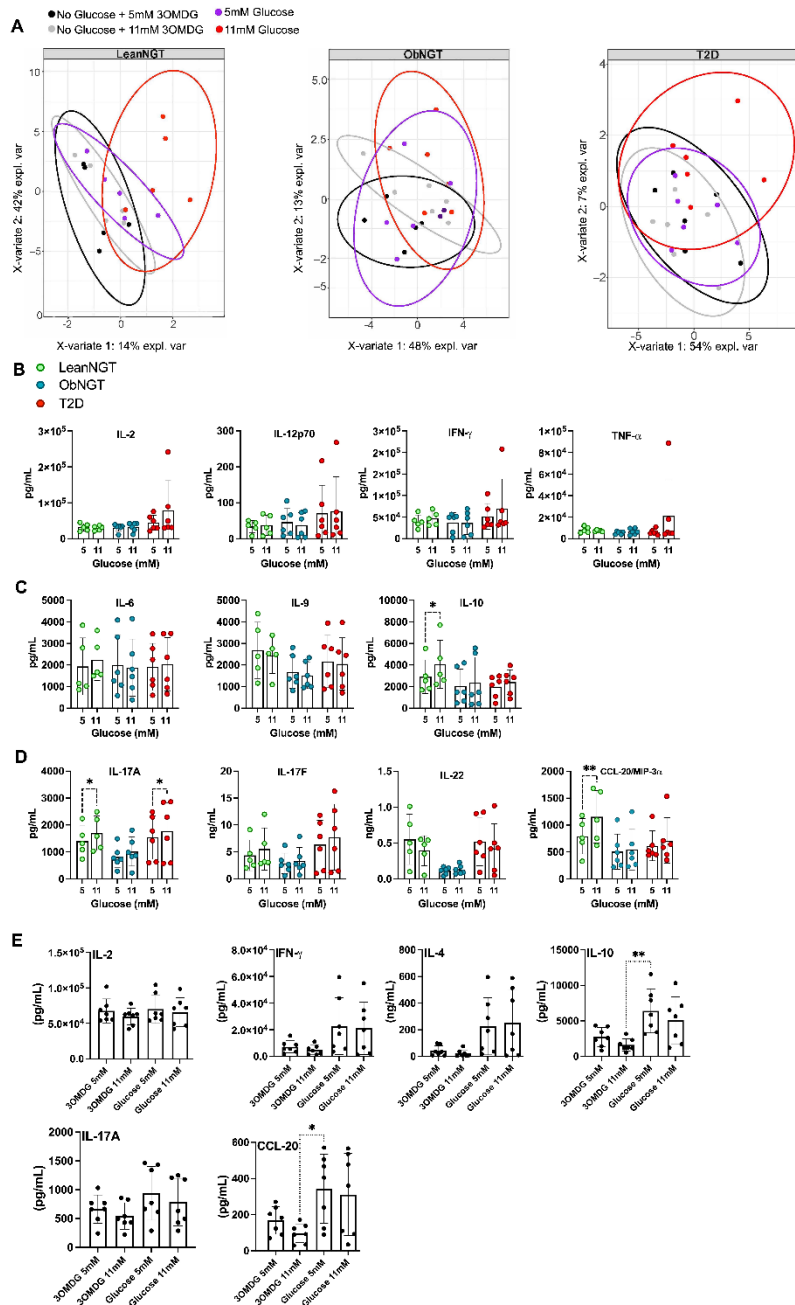

**Figure S2. Physiological glucose concentrations and osmolarity controls *in vitro* do not alter cytokine production from activated PBMCs or total CD4<sup>+</sup> T cells in obesity/T2D.**

(A) PLSDA 2D projections of cytokine production from T-cell stimulated PBMCs treated with no glucose + 5mM or 11mM osmolarity control 3-O-Methyl-D-glucopyranose (3OMDG) (black and gray dots, respectively), 5mM glucose (purple dots), or 11mM glucose (red dots). (B-D) Representative cytokines of Th1 (B), Th2 (C), and Th17 (D) cells under 5 and 11mM glucose conditions. LeanNGT (n = 5, green dots), ObNGT (n = 6, blue dots), and T2D (n = 6, red dots). (E) Total CD4<sup>+</sup> T cells, from subjects with obesity and NGT (n = 7), were stimulated in media containing either no glucose and 5mM or 11mM 3OMDG, 5mM glucose, or 11mM glucose. Differences were assessed by a two-way ANOVA (B-D) or one-way ANOVA (E) and Bonferroni's multiple comparisons. \*: p < 0.05, \*\*: p < 0.01

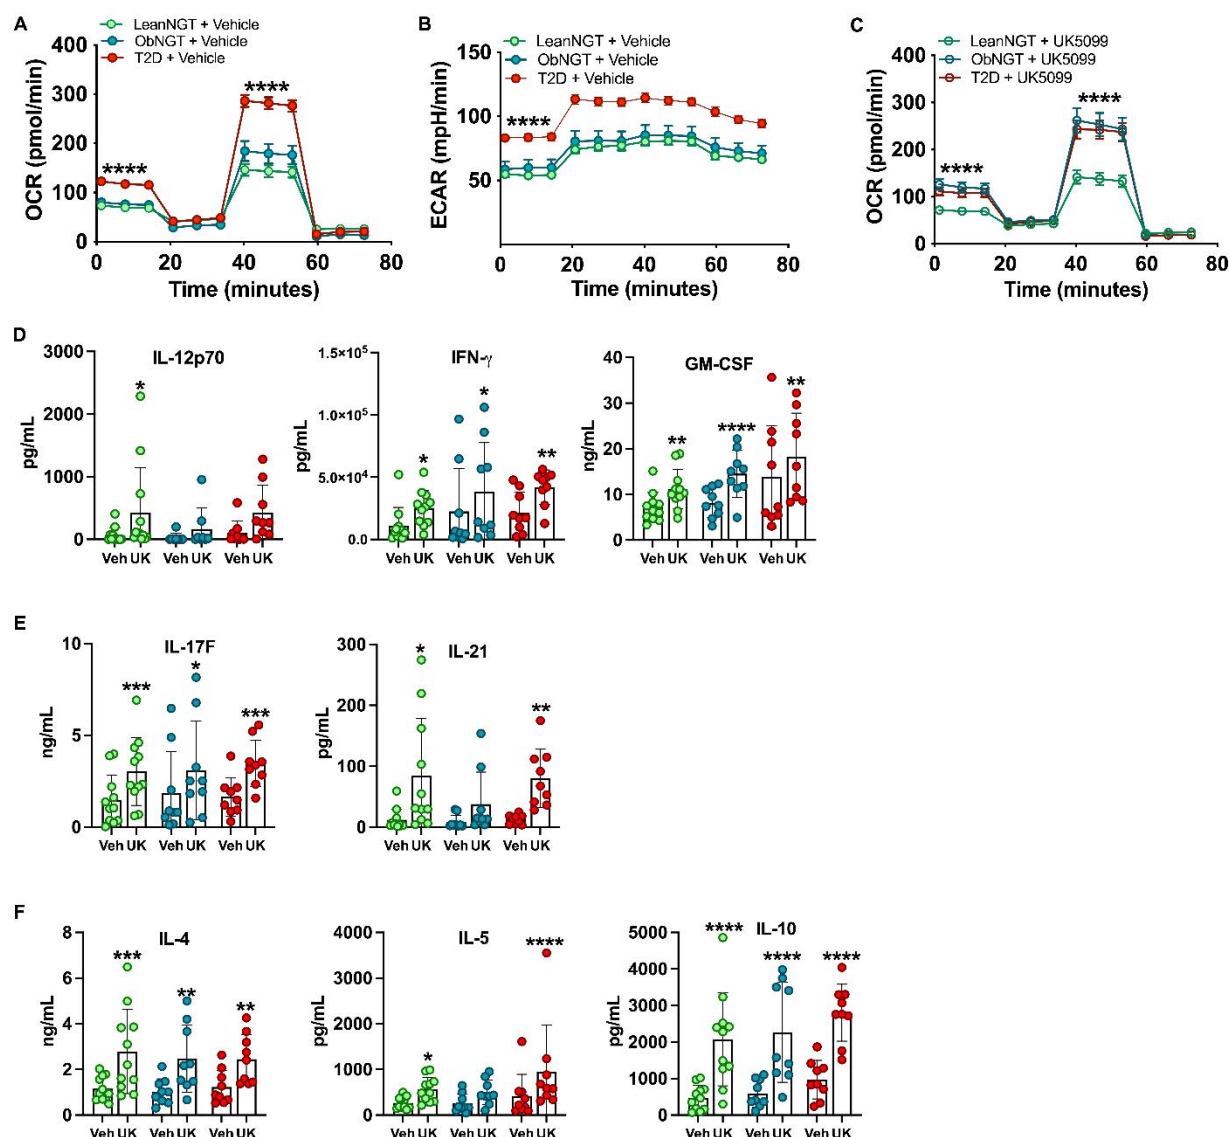

**Figure S3. Blocking mitochondrial pyruvate import enhances cytokine production from Teff cells, irrespective of glycemic control or changes to metabolism in total CD4<sup>+</sup> T cells.**

(A) OCR plot of a mitochondrial stress test comparing total CD4<sup>+</sup> T cells from LeanNGT (n = 6), ObNGT (n = 5), and T2D (n = 6) donors treated with vehicle (filled green, blue, and red dots, respectively). (B) ECAR plot of comparison of cells from LeanNGT (green dots), ObNGT (blue dots), and T2D (red dots) donors treated with vehicle. (C) OCR plot of a mitochondrial stress test comparing cells from LeanNGT, ObNGT, and T2D donors treated with UK5099 (open green, blue, and red dots, respectively). (D-F) Representative cytokines of Th1 (D), Th17 (E), and Th2 (F) cells from activated CD4<sup>+</sup>CD25<sup>+</sup> Teff cells treated with either vehicle or UK5099. LeanNGT (n = 11, green dots), ObNGT (n = 9, blue dots), and T2D (n = 9, red dots). Differences were assessed by a one-way ANOVA (A-C) or two-way ANOVA (D-F) and Bonferroni's multiple comparisons. \*:  $p < 0.05$ , \*\*:  $p < 0.01$ , \*\*\*:  $p < 0.001$ , \*\*\*\*:  $p < 0.0001$
